# Supplementary material for: Thin film CdSe/CuSe photovoltaic on a flexible single walled carbon nanotube substrate
Source: Royal Society of Chemistry journal article supplement (doi:10.1039/c3cp50435b), 2013-01-01
Supplement: c3cp50435b.pdf [file c3cp50435b.pdf]

#412

# **Thin Film CdSe/CuSe Photovoltaic on a Flexible Single Walled Carbon Nanotube Substrate**

Christopher E. Hamilton, Dennis J. Flood, and Andrew R. Barron\*

*Department of Chemistry, Rice University, Houston, TX 77005, USA.*

*Natcore Technology, Inc., 87 Maple Avenue, Red Bank, NJ 07701, USA.*

*Department of Mechanical Engineering and Materials Science, Rice University, Houston,  
TX 77005, USA.*

*College of Engineering, Swansea University, Singleton Park, Swansea SA2 8PP, Wales,  
UK*

Supplementary Materials

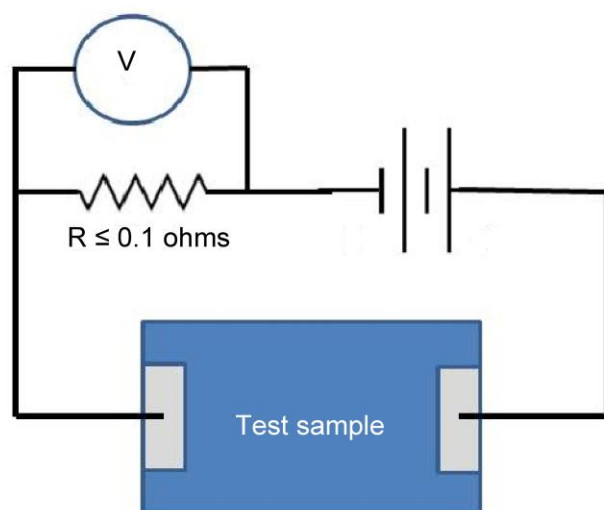

**Fig. S1.** Circuit diagram for simple photoconductance test (D. J. Flood and A. R. Barron, *A Simple Test Apparatus to Verify the Photoresponse of Experimental Photovoltaic Materials and Prototype Solar Cells*, Connexions Web site. <http://cnx.org/content/m42271/1.3/>, Nov 18, 2012).

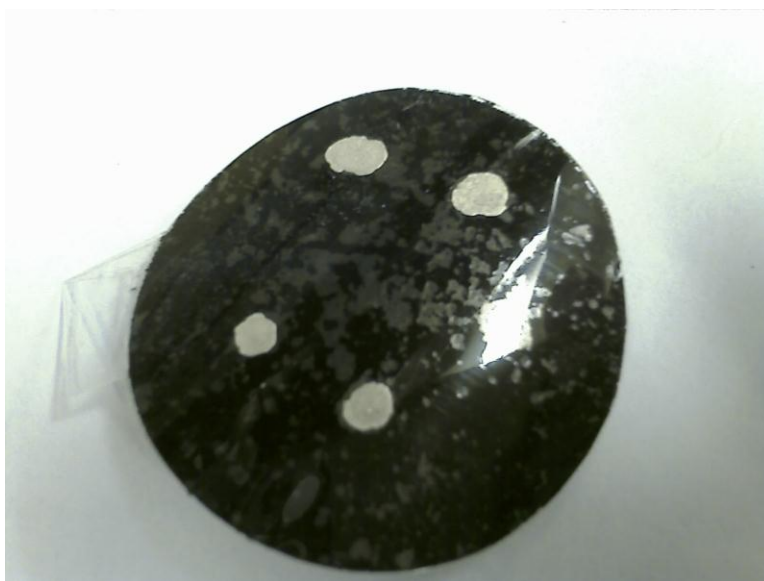

**Fig. S2.** Photograph of the underside of the Buckypaper-on-tape showing the silver contacts aligned with the adhesive tape.

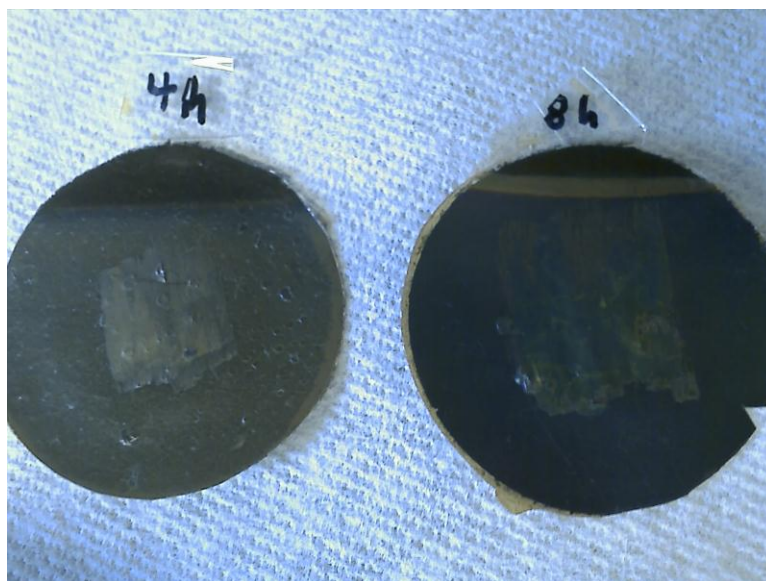

**Fig. S3.** Photograph of the CdSE films grown on Buckypaper-on-tape.

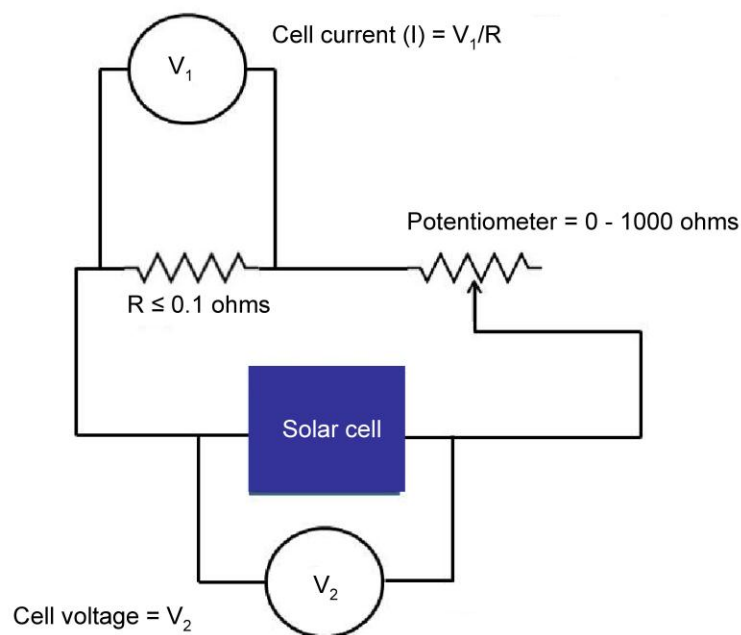

**Fig. S4.** PV testing configuration, under illumination by a 90 W halogen lamp (D. J. Flood and A. R. Barron, *A Simple Test Apparatus to Verify the Photoresponse of Experimental Photovoltaic Materials and Prototype Solar Cells*, Connexions Web site. <http://cnx.org/content/m42271/1.3/>, Nov 18, 2012).
